# Supplementary material for: Single crystal growth and property investigation of Dy3+ and Tb3+ co-doped Gd3Sc2Al3O12 (GSAG): multiple applications for GaN blue LD pumped all-solid-state yellow lasers and UV or blue light chip excited solid-state lighting
Source: Royal Society of Chemistry journal article supplement (doi:10.1039/d1tc02294f), 2021-01-01
Supplement: d1tc02294f1.pdf [file d1tc02294f1.pdf]

**Supporting Information for:**

**Single crystal growth and properties investigation of Dy<sup>3+</sup> and Tb<sup>3+</sup> co-doped Gd<sub>3</sub>Sc<sub>2</sub>Al<sub>3</sub>O<sub>12</sub> (GSAG): multi-applications for GaN blue LD pumped all-solid-state yellow lasers and UV or blue lights chip excited solid-state lightings**

Shoujun Ding <sup>a, b\*</sup>, Hao Ren <sup>a</sup>, Yong Zou <sup>a</sup>, Wenpeng Liu <sup>b</sup>, Qingli Zhang <sup>b,\*</sup>

<sup>a</sup> School of Science and Engineering of Mathematics and Physics, Anhui University of Technology, Maanshan, Anhui, 243002, PR China.

<sup>b</sup> Anhui Institute of Optics and Fine Mechanics, Chinese Academy of Sciences, Hefei, Anhui, 230031, PR China

**1. Effective segregation coefficient of Dy<sup>3+</sup> (Fig.S1)**

**2. Judd-Ofelt (J-O) calculation**

**3. Fig.S2**

**4. Fig.S3**

---

\* corresponding author e-mail: [sjding@ahut.edu.cn](mailto:sjding@ahut.edu.cn) (S.J. Ding)

## 1. Effective segregation coefficient of Dy<sup>3+</sup>

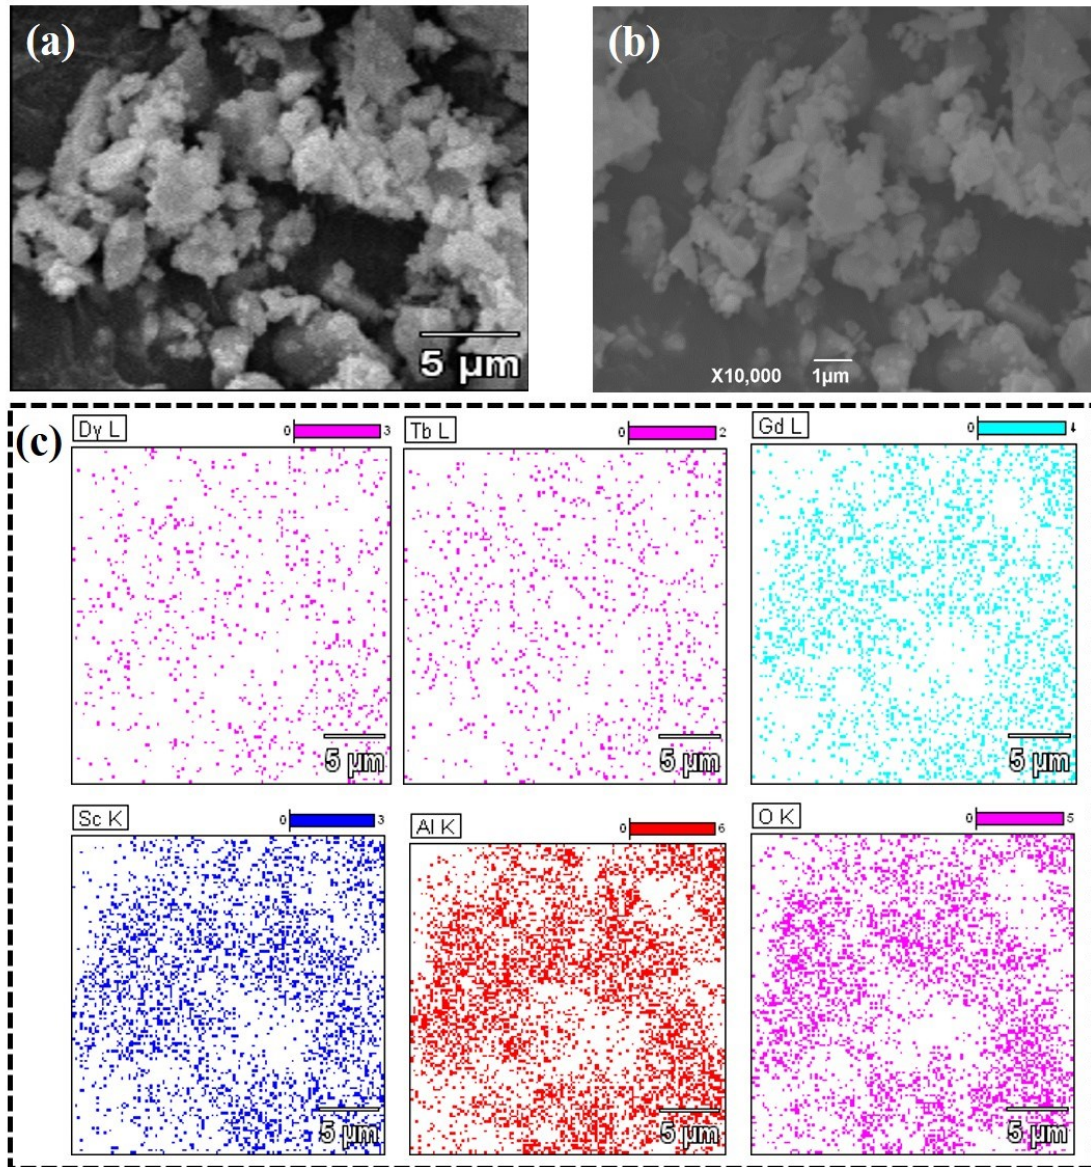

FIG.S1 (a) and (b) The morphology of the powder sample used to characterize the elements mapping; (c) The mapping of the elements in Dy,Tb:GSAG crystal.

## 2. Judd-Ofelt (J-O) calculation

The Judd-Ofelt (J-O) calculation is an effectively and widely used method to evaluating the 4f configuration radiative transitions of rare-earth ions in crystals or glasses[1-6]. In this work, the J-O calculation for Dy,Tb:GSAG crystal was conducted on the basis of the measured absorption spectrum in the range of 400~1700 nm (exclude the Tb<sup>3+</sup> absorption). The detailed J-O calculation procedure is similar to that reported in our previous work. The square of the reduced matrix elements  $U^{(t)}$  used for the J-O

calculation has been described by Carnall et al [7]. The J-O parameters, including experimental line strength  $S_{exp}(J''J')$  and calculated line strength  $S_{cal}(J''J')$ , were calculated and listed in Table S1. The relative square deviation R for the J-O calculation was fitted to be 9.77%, which indicates the high reliability of the calculated values. The intensity parameters  $\Omega_t$  (t=2, 4, 6) were fitted to be  $2.12 \times 10^{-20} \text{ cm}^2$ ,  $2.58 \times 10^{-20} \text{ cm}^2$  and  $2.46 \times 10^{-20} \text{ cm}^2$ , respectively. According to these calculated intensity parameters, the line strength of the electric-dipole transition  $S_{ed}$ , magnetic-dipole transition  $S_{md}$ , radiative transition rate  $A(J'' \rightarrow J')$ , fluorescence branching ratio  $\beta(J'' \rightarrow J')$  and radiative lifetime  $\tau_{rad}$  for the transitions of  $\text{Dy}^{3+}$  from its  ${}^4\text{F}_{9/2}$  level to different lower levels were calculated, as listed in Table S2.

**Table S1 The calculated spectral parameters of Dy,Tb:GSAG crystal**

| Transitions from ${}^6\text{H}_{15/2}$   | $\bar{\lambda}$ (nm) | $S_{exp}$ ( $10^{-20} \text{ cm}^2$ ) | $S_{cal}$ ( $10^{-20} \text{ cm}^2$ ) |
|------------------------------------------|----------------------|---------------------------------------|---------------------------------------|
| ${}^4\text{G}_{11/2}$                    | 428                  | 0.0319                                | 0.0382                                |
| ${}^4\text{I}_{15/2}$                    | 453                  | 0.145                                 | 0.199                                 |
| ${}^4\text{F}_{9/2}$                     | 475                  | 0.0378                                | 0.0903                                |
| ${}^6\text{F}_{3/2}$                     | 751                  | 0.115                                 | 0.150                                 |
| ${}^6\text{F}_{5/2}$                     | 805                  | 0.754                                 | 0.848                                 |
| ${}^6\text{F}_{7/2}$                     | 901                  | 1.73                                  | 2.03                                  |
| ${}^6\text{F}_{9/2}+{}^6\text{H}_{7/2}$  | 1095                 | 2.02                                  | 3.07                                  |
| ${}^6\text{F}_{11/2}+{}^6\text{H}_{9/2}$ | 1280                 | 3.27                                  | 4.83                                  |
| ${}^6\text{H}_{11/2}$                    | 1690                 | 2.30                                  | 1.77                                  |

Relative square deviation: R=9.77%;  $\Omega_2=2.12$ ,  $\Omega_4=2.58$ ,  $\Omega_6=2.46$

**Table S2 The calculated fluorescence line strengths, branching ratios, radiative lifetimes, and transition rates of Dy,Tb:GSAG crystal**

| ${}^4\text{F}_{9/2} \rightarrow {}^2\text{S}+1\text{L}_J$ transitions | $\bar{\lambda}$ (nm) | $S_{ed}$ ( $10^{-20} \text{ cm}^2$ ) | $S_{md}$ ( $10^{-20} \text{ cm}^2$ ) | A ( $\text{s}^{-1}$ ) | $\beta$ (%) | $\tau_{rad}$ (ms) |
|-----------------------------------------------------------------------|----------------------|--------------------------------------|--------------------------------------|-----------------------|-------------|-------------------|
| ${}^6\text{F}_{1/2}$                                                  | 1490                 | 0.000119                             | 0                                    | 0.01807               | 0.00142     |                   |
| ${}^6\text{F}_{3/2}$                                                  | 1375                 | 0.000644                             | 0                                    | 0.1245                | 0.00976     |                   |
| ${}^6\text{F}_{5/2}$                                                  | 1239                 | 0.0169                               | 0                                    | 4.463                 | 0.350       |                   |
| ${}^6\text{F}_{7/2}$                                                  | 1052                 | 0.0101                               | 0.0200                               | 4.339                 | 1.03        |                   |
| ${}^6\text{H}_{5/2}$                                                  | 941                  | 0.00451                              | 0                                    | 2.718                 | 0.213       |                   |
| ${}^6\text{F}_{9/2}$                                                  | 873                  | 0.00479                              | 0.0120                               | 3.621                 | 1.01        | 0.784             |
| ${}^6\text{H}_{7/2}$                                                  | 856                  | 0.0237                               | 0.00692                              | 19.05                 | 1.94        |                   |
| ${}^6\text{F}_{11/2}$                                                 | 799                  | 0.0138                               | 0.0781                               | 13.65                 | 7.26        |                   |
| ${}^6\text{H}_{9/2}$                                                  | 762                  | 0.0153                               | 0.00449                              | 17.34                 | 1.77        |                   |
| ${}^6\text{H}_{11/2}$                                                 | 667                  | 0.0331                               | 0.0150                               | 55.93                 | 6.43        |                   |

|                       |     |        |   |       |      |
|-----------------------|-----|--------|---|-------|------|
| ${}^6\text{H}_{13/2}$ | 582 | 0.265  | 0 | 674.6 | 52.9 |
| ${}^6\text{H}_{15/2}$ | 490 | 0.0810 | 0 | 345.6 | 27.1 |

### 3. Fig.S2

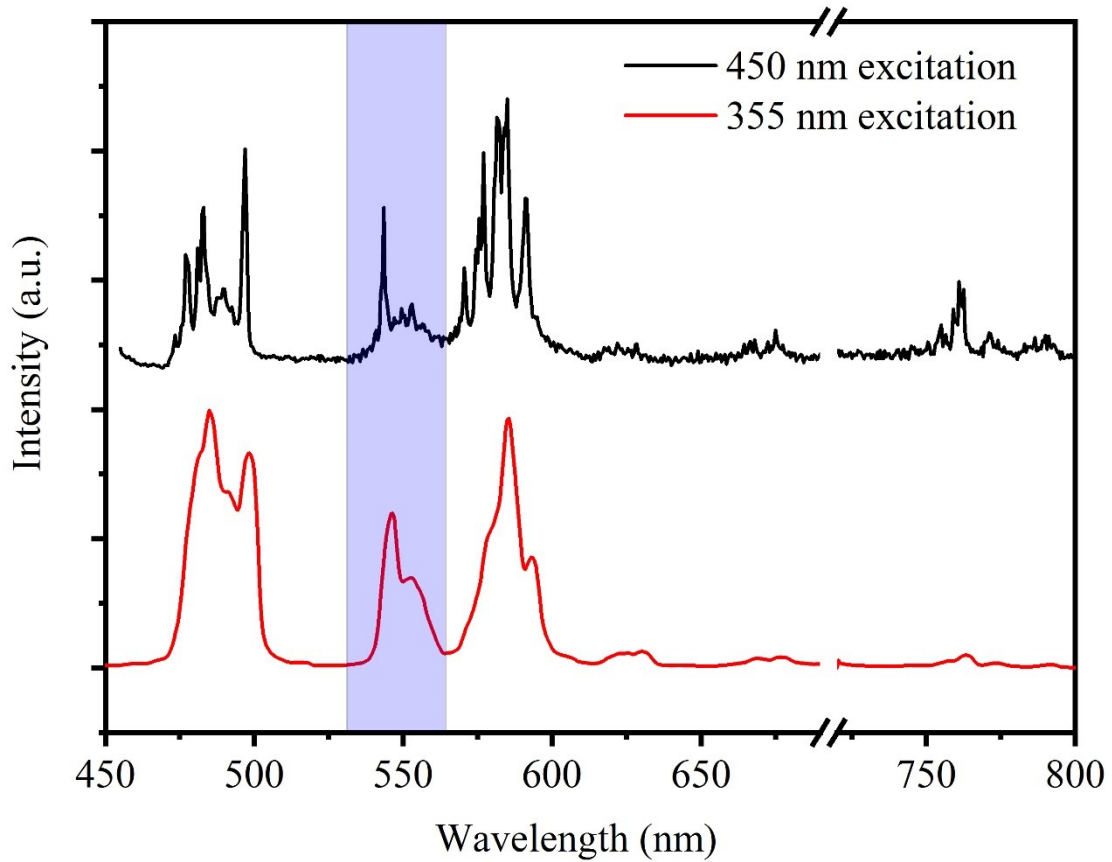

**Fig.S2** The room temperature photoluminescence spectra of Dy,Tb:GSAG crystal with the excitation of 450 nm and 355 nm, respectively.

### 4. Fig.S3

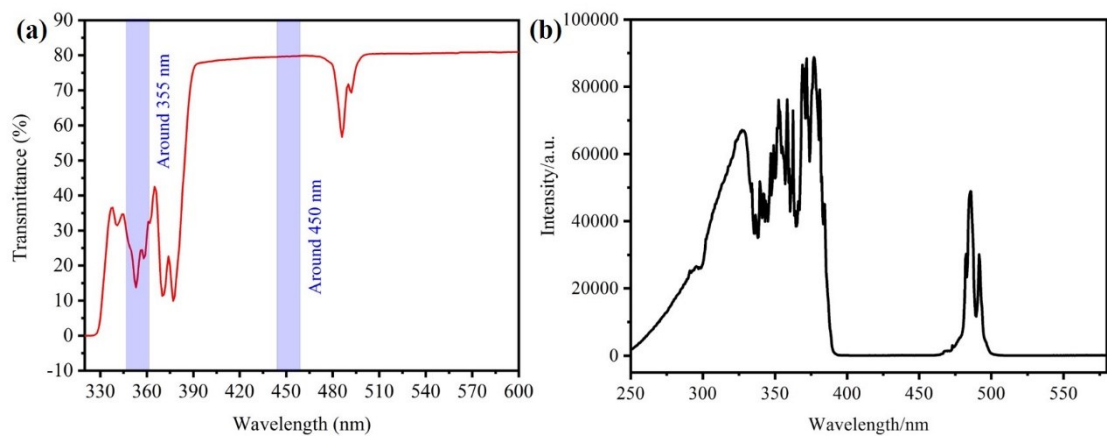

**Fig.S3** The absorption of  $\text{Tb}^{3+}$  at around 355 nm and 450 nm determined by measuring the spectra of  $\text{Tb}_3\text{Sc}_2\text{Al}_3\text{O}_{12}$  (TSAG) crystal. The transmission spectrum (a) and excitation spectrum (monitoring at 545 nm) (b) of TSAG crystal

## REFERENCES

- [1] B.R. Judd, *Physical review* 127 (1962) 750.
- [2] G. Ofelt, *The journal of chemical physics* 37 (1962) 511.
- [3] Y. Tian, B. Chen, R. Hua, J. Sun, L. Cheng, H. Zhong, X. Li, J. Zhang, Y. Zheng, T. Yu, *Journal of Applied Physics* 109 (2011) 053511.
- [4] B. Tian, B. Chen, Y. Tian, X. Li, J. Zhang, J. Sun, H. Zhong, L. Cheng, S. Fu, H. Zhong, *Journal of Materials Chemistry C* 1 (2013) 2338.
- [5] Y. Zhang, B. Chen, S. Xu, X. Li, J. Zhang, J. Sun, X. Zhang, H. Xia, R. Hua, *Physical Chemistry Chemical Physics* 20 (2018) 15876.
- [6] C. Yu, B. Chen, X. Zhang, X. Li, J. Zhang, S. Xu, H. Yu, J. Sun, Y. Cao, H. Xia, *Physical Chemistry Chemical Physics* 22 (2020) 7844.
- [7] W. Carnall, G. Goodman, K. Rajnak, R. Rana, *The Journal of Chemical Physics* 90 (1989) 3443.
